1 **Optimizing bulk segregant analysis of drug resistance using *Plasmodium falciparum* genetic**  
2 **crosses conducted in humanized mice**

3

4 Katelyn V. Brenneman<sup>1¶</sup>, Xue Li<sup>2¶</sup>, Sudhir Kumar<sup>3¶</sup>, Elizabeth Delgado<sup>2</sup>, Lisa A. Checkley<sup>1</sup>,  
5 Douglas A. Shoue<sup>1</sup>, Ann Reyes<sup>2</sup>, Biley A. Abatiyow<sup>3</sup>, Meseret T. Haile<sup>3</sup>, Rupam Tripura<sup>4,5</sup>, Tom  
6 Peto<sup>4,5</sup>, Dysoley Lek<sup>6,7</sup>, Katrina A Button-Simons<sup>1</sup>, Stefan H. Kappe<sup>3,8</sup>, Mehul Dhorda<sup>4,5</sup>,  
7 François Nosten<sup>5,9</sup>, Standwell C. Nkhoma<sup>10</sup>, Ian H. Cheeseman<sup>11</sup>, Ashley M. Vaughan<sup>3,8\*</sup>,  
8 Michael T. Ferdig<sup>1\*</sup>, Tim J. C. Anderson<sup>2\*</sup>

9 <sup>1</sup> Eck Institute for Global Health, Department of Biological Sciences, University of Notre Dame,  
10 Notre Dame, Indiana, USA.

11 <sup>2</sup> Program in Disease Intervention and Prevention, Texas Biomedical Research Institute, San  
12 Antonio, Texas, USA.

13 <sup>3</sup> Center for Global Infectious Disease Research, Seattle Children's Research Institute, Seattle,  
14 Washington, USA.

15 <sup>4</sup> Mahidol-Oxford Tropical Medicine Research Unit, Faculty of Tropical Medicine, Mahidol  
16 University, Bangkok, Thailand.

17 <sup>5</sup> Centre for Tropical Medicine and Global Health, Nuffield Department of Medicine Research  
18 building, University of Oxford Old Road campus, Oxford, UK.

19 <sup>6</sup> National Center for Parasitology, Entomology and Malaria Control, Phnom Penh, Cambodia

20 <sup>7</sup> School of Public Health, National Institute of Public Health, Phnom Penh, Cambodia

21 <sup>8</sup> Department of Pediatrics, University of Washington, Seattle, Washington, USA

22 <sup>9</sup> Shoklo Malaria Research Unit, Mahidol-Oxford Tropical Medicine Research Unit, Faculty of  
23 Tropical Medicine, Mahidol University, Mae Sot, Thailand.

24 <sup>10</sup> BEI Resources, American Type Culture Collection (ATCC), Manassas, Virginia, USA.

25 <sup>11</sup> Program in Host Pathogen Interactions, Texas Biomedical Research Institute, San Antonio,  
26 Texas, USA.

27

28 ¶ Katelyn Vendrely Brenneman, Xue Li and Sudhir Kumar contributed equally to this work.

29 \*Co-corresponding authors: [ashley.vaughan@seattlechildrens.org](mailto:ashley.vaughan@seattlechildrens.org) (AMV), [mferdig@nd.edu](mailto:mferdig@nd.edu)  
30 (MTF) and [tanderso@TxBiomed.org](mailto:tanderso@TxBiomed.org) (TJCA).

31

32 **Abstract**

33 *Background:* Classical genetic crosses in malaria parasites involve isolation, genotyping, and  
34 phenotyping of multiple progeny parasites, which is time consuming and laborious. Bulk segregant  
35 analysis (BSA) offers a powerful and efficient alternative to identify loci underlying complex traits  
36 in the human malaria parasite, *Plasmodium falciparum*.

37 *Methods:* We have used BSA, which combines genetic crosses using humanized mice with pooled  
38 sequencing of progeny populations to measure changes in allele frequency following selection  
39 with antimalarial drugs. We used dihydroartemisinin (DHA) drug selection in two genetic crosses  
40 (*Mal31*×*KH004* and *NF54*×*NHP1337*). We specifically investigated how synchronization,  
41 cryopreservation, and the drug selection regimen of progeny pools impacted the success of BSA  
42 experiments.

43 *Findings:* We detected a strong and repeatable quantitative trait locus (QTL) at chr13 *kelch13* locus  
44 in both crosses, but did not detect QTLs at ferredoxin (*fd*), the apicoplast ribosomal protein S10  
45 (*arps10*), multidrug resistance protein 2 (*mdr2*). QTLs were detected using synchronized, but not  
46 unsynchronized pools, consistent with the stage-specific action of DHA. We also successfully  
47 applied BSA to cryopreserved progeny pools.

48 *Interpretation:* Our results provide proof-of-principal of the utility of BSA for rapid, robust genetic  
49 mapping of drug resistance loci. Use of cryopreserved progeny pools expands the utility of BSA  
50 because we can conduct experiments using archived progeny pools from previous genetic crosses.  
51 BSA provides a powerful approach that complements traditional QTL methods for investigating  
52 the genetic architecture of resistance to antimalarials, and to reveal new or accessory loci  
53 contributing to artemisinin resistance.

54 *Funding:* National Institutes of Health (NIH); Wellcome trust.

55

56 Key words: Linkage analysis; Artemisinin; dihydroartemisinin; cryopreservation; kelch13;

57

## Research in context

### *Evidence before this study*

Genetic crosses have been immensely successful for determining the genetic basis of drug resistance in malaria parasites, but require laborious cloning, characterization of drug resistance and genome-wide genotyping of individual progeny. This is a major limitation given that genetic crosses can now be conducted efficiently using humanized mice, rather than chimpanzees. Bulk segregant analysis (BSA) provides an attractive alternative approach because (i) large numbers of uncloned recombinant progeny can be analyzed, increasing statistical power (ii) phenotyping is not required, because we identify QTLs by treatment of progeny bulks, and identifying genome regions that show skews in allele frequency after treatment (iii) genome sequencing of bulk samples provides a rapid, accurate readout of genome-wide allele frequencies. This approach has been effectively leveraged in yeast, rodent malaria and several model organisms.

### *Added value of this study*

Here we validate and optimize this approach for *P. falciparum* genetic crosses, focusing on resistance to dihydroartemisin (DHA) a central component of the first-line antimalarial combination. Mutations in *kelch13* are known to confer resistance to DHA, but several additional candidate loci have also been suggested to contribute. Our results confirm involvement of *kelch13*, but did not identify linkage with other putative candidate loci. We optimized methodology, showing that synchronization is critical, and that BSA can be successfully applied to cryopreserved progeny pools.

### *Implications of all the available evidence*

BSA combined with recent advances in rapidly generating genetic crosses provides a powerful approach to investigate the genetic basis of drug resistance in *P. falciparum*.

## 60 1. Introduction

61 Identifying genetic changes conferring drug resistance helps understand the resistance  
62 mechanisms and track the spread of resistance alleles in infectious disease-causing organisms,  
63 including malaria parasites. For malaria parasites, both association mapping and linkage analysis  
64 approaches have been used to understand the genetic mechanisms underlying drug resistance <sup>1</sup>.  
65 For example, the chloroquine resistance transporter (*crt*) conferring chloroquine (CQ) resistance  
66 in the malaria parasite *Plasmodium falciparum* was initially located on chromosome 7 through  
67 linkage analysis <sup>2,3</sup> and further identified by fine mapping <sup>4</sup>. Genome-wide association studies  
68 (GWAS) have also been applied to map genes associated with resistance to antimalarials <sup>5</sup> as well  
69 as additional loci arising on genetic backgrounds that carry resistance-associated alleles <sup>6</sup>.  
70 However, both linkage mapping and association studies have their limitations: linkage mapping  
71 requires laborious isolation, genotyping, and phenotyping of multiple progeny parasites; GWAS  
72 requires months or years of sample collection.

73  
74 Bulk segregant analysis (BSA), a complementary alternative to traditional linkage methods, can  
75 provide a simple and rapid approach to identify loci that contribute to complex traits without the  
76 need to phenotype and genotype individual progeny. Instead, using pooled sequencing of progeny  
77 populations, BSA measures changes in allele frequency following the application of different  
78 selection pressures (e.g., by drugs). The BSA approach is simple; by using the complete pool of  
79 unique recombinants for analysis it requires less labor and cost and has the potential for increased  
80 statistical power over traditional linkage mapping <sup>7</sup>. Nevertheless, BSA cannot directly examine  
81 epistatic interactions or measure phenotypes that are not amenable to selection in bulk. The BSA  
82 approach was initially developed to study diseases in human and plants, in which DNA from  
83 individuals with different phenotypes were pooled and genotyped to identify loci that were  
84 enriched for different alleles in each pool <sup>8</sup>. BSA has also been extensively used with genetic  
85 crosses of rodent malaria parasites (where it is termed linkage group selection (LGS)) to map genes  
86 determining blood stage multiplication rate, virulence, and immunity in *Plasmodium yoelii* <sup>9</sup>, as  
87 well as mutations conferring ART resistance and strain-specific immunity in *Plasmodium*  
88 *chabaudi* <sup>10,11</sup>. BSA has also been used in yeast <sup>7</sup>, *C. elegans* <sup>12</sup>, *Eimeria tenella* <sup>13</sup>, and the human  
89 blood fluke *Schistosoma mansoni* <sup>14</sup>. We have previously applied BSA to the human malaria  
90 parasite *P. falciparum* to identify genes that impact parasite fitness throughout the intra-

91 erythrocytic stages of the lifecycle<sup>15</sup> and polymorphisms in nutrient acquisition/metabolism  
92 pathways<sup>16</sup>.

93 Artemisinin combination therapies (ACTs) are the current first-line malaria treatments in most  
94 countries for the most lethal human malaria parasite, *P. falciparum*. Resistance to artemisinin  
95 (ART) is mediated by mutations in *kelch13*, a gene required for parasite endocytosis<sup>17</sup>. Studies in  
96 Southeast Asia uncovered the independent emergence of *kelch13* resistance-associated alleles and  
97 their rapid spread<sup>18,19</sup>. Furthermore, recent studies have also detected an increased allele frequency  
98 of *kelch13* mutations in clinically artemisinin-resistant *P. falciparum* in Africa<sup>20</sup>. Nonsynonymous  
99 polymorphisms in ferredoxin (*fd*), the apicoplast ribosomal protein S10 (*arps10*), multidrug  
100 resistance protein 2 (*mdr2*), and *crt* have also been identified and show strong associations with  
101 artemisinin resistance<sup>6</sup>, while (iv) *in vitro* selection has revealed other loci, such as *pfcoronin*, that  
102 can modulate ART-R<sup>21</sup>.

103 We designed this study to optimize aspects of the BSA approach for the identification of drug  
104 resistance-associated loci in malaria parasites (**Figure 1**), using dihydroartemisinin (DHA), the  
105 active metabolite of artemisinin, as our test drug. We chose DHA because (i) artemisinin is one of  
106 the most widely used antimalarial drugs, (ii) *kelch13* is a known resistance locus, providing a good  
107 control for our methods, (iii) identification of additional loci involved in drug resistance would be  
108 of great interest, and (iv) this drug is stage specific, targeting early rings, providing additional  
109 challenges for BSA. We aimed to answer three main questions. First, for stage-specific drugs such  
110 as DHA, can we detect QTLs in unsynchronized parasite pools, or is prior synchronization required?  
111 This is important because synchronization may reduce the size of progeny pools, and for successful  
112 BSA it is critical to have progeny pools containing large numbers of recombinants. Second, how  
113 can we determine the optimal drug dose regimen to maximize signal? Third, can we use  
114 cryopreserved progeny pools for BSA experiments? This would greatly enhance the utility of BSA  
115 by allowing experiments to be conducted long after genetic crosses have been conducted, using  
116 archived progeny pools. However, as with synchronization, we were concerned that  
117 cryopreservation would reduce the diversity of progeny pools limiting our ability to detect QTLs.

118 We performed DHA BSA in two genetic crosses between ART-S African and ART-R Southeast  
119 Asian parasites (*Mal31* × *KH004* and *NF54* × *NHP1337*). These two crosses are of particular interest  
120 because SNPs in the *kelch13* locus, as well as SNPs in each of the four loci associated with ART-

121 R in Miotto et al <sup>6</sup> genome wide association study (WGAS) are segregating in both crosses. We  
122 detected strong and repeatable QTL at the *kelch13* locus on chromosome 13 in both crosses, but  
123 found no evidence for involvement of other loci. Chr 13 QTLs were detected only in synchronized  
124 parasites. We also show that the application of eRRSA, a modification of the ring stage survival  
125 assay, allows for a rational determination of optimal drug dose for use in BSA. Finally, we  
126 successfully applied BSA with cryopreserved progeny pools.

127

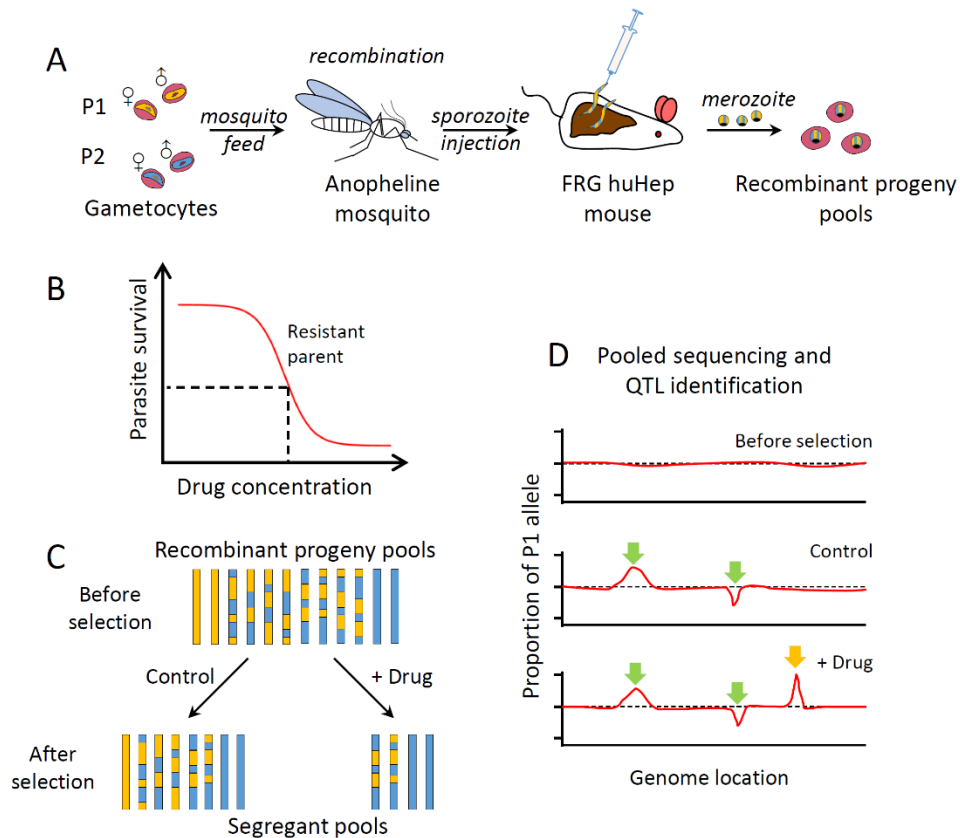

128

129 **Figure 1. The principles of bulk segregant analysis with human malaria parasites.** (A) Generation  
130 of recombinant progeny pools using *Anopheles stephensi* mosquitoes and FRG huHep mice. (B)  
131 Determination of drug concentration for bulk segregant analysis (BSA). A standard approach is to  
132 measure the IC<sub>50</sub> and IC<sub>90</sub> of the resistant parent, however, in this study, we used eRRSA to  
133 determine a discerning drug concentration for selection since classical IC<sub>50</sub> and IC<sub>90</sub> measurements  
134 using DHA do not correlate with clinical parasite clearance rate. (C) Apply selection with drug of  
135 choice, each bar indicates a representative recombinant progeny. (D) Genomic sequencing

136 measures changes in allele frequency of segregant pools. Green arrows indicate allele frequency  
137 changes detected from both pools with and without drug treatment, which are thus not related to  
138 drug resistance, while the orange arrow indicates a locus conferring drug resistance.

139

## 140 **2. Methods**

### 141 *2.1. Ethics approval and consent to participate*

142 The study was performed in strict accordance with the recommendations in the Guide for the  
143 Care and Use of Laboratory Animals of the National Institutes of Health (NIH), USA. To this end,  
144 the Seattle Children's Research Institute (SCRI) has an Assurance from the Public Health Service  
145 (PHS) through the Office of Laboratory Animal Welfare (OLAW) for work approved by its  
146 Institutional Animal Care and Use Committee (IACUC). All of the work carried out in this study  
147 was specifically reviewed and approved by the SCRI IACUC.

148

### 149 *2.2. Preparation of the genetic crosses*

150 We generated the crosses using FRG NOD huHep mice with human chimeric livers and *A.*  
151 *stephensi* mosquitoes as described by Vaughan *et al.*<sup>22</sup>. Two genetic crosses were generated for  
152 this study - Mal31×KH004 and NF54×NHP1337. Three individual recombinant pools were  
153 generated for each cross, by using different cages of infected mosquitoes. To start each cross,  
154 gametocytes from both parental parasite strains were diluted to 0.5% gametocytemia in a human  
155 serum erythrocyte mix, to generate infectious blood meals (IBMs). IBMs from each parent were  
156 mixed at equal proportions and fed to three cages of mosquitos (150 per cage).

157 We examined the mosquito infection rate and oocyst number per infected mosquito 7-10 days post-  
158 feeding. Fifteen mosquitoes were randomly picked from each cage and dissected under microscopy.  
159 Sporozoites were isolated from infected mosquito salivary glands and 2-4 million sporozoites from  
160 each cage of mosquitoes were injected into three FRG huHep mice (one cage per mouse),  
161 intravenously. To allow the liver stage-to-blood stage transition, mice are infused with human  
162 erythrocytes six and seven days after sporozoite injection. Four hours after the second infusion,  
163 the mice are euthanized and exsanguinated to isolate the circulating ring stage *P. falciparum*-  
164 infected human erythrocytes. The parasites from each mouse constitute the initial recombinant



165 pools of recombinant progeny for genetic mapping experiments. We maintained the initial pools  
166 in AlbuMAX supplemented RPMI media; we genome sequenced aliquots from each pool to check  
167 allele frequencies from both parents. Two recombinant pools from each cross were used in this  
168 study for DHA BSA experiments.

### 169 *2.3. Cryopreservation of progeny bulks*

170 We expanded progeny bulks by growing in AlbuMAX supplemented RPMI for 7 days after the  
171 mouse bleeds. When cultures were 3% parasitemia and at least 70% ring-stage, progeny bulk  
172 stocks were cryopreserved in glycerolyte. Each 0.5ml cryopreserved stock contained ~100  $\mu$ l  
173 packed red cells. We thawed and cultured parasites for 9 days prior to set-up in BSA experiments.

### 174 *2.4. Measuring DHA resistance level using an eRRSA method*

175 Cryopreserved stocks of the KH004 parent and the Mal31 $\times$ KH004 uncloned bulk recombinant  
176 progeny pool and were thawed and grown in complete media (CM) [RPMI 1640 with L-glutamine  
177 (Gibco, Life Technologies), 50 mg/L hypoxanthine (Calbiochem, Sigma-Aldrich), 25 mM HEPES  
178 (Corning, VWR), 0.5% Albumax II (Gibco, Life Technologies), 10ug/ml gentamycin (Gibco, Life  
179 Technologies), 0.225% sodium bicarbonate (Corning, VWR)] at 5% hematocrit in O<sup>+</sup> red blood  
180 cells (RBC) (Biochemed Services, Winchester, VA). Cultures were grown in separate flasks and  
181 maintained at constant pH, 7.0-7.5, temperature, 37°C, and atmosphere, 5% CO<sub>2</sub>/5% O<sub>2</sub>/90% N<sub>2</sub>.  
182 Cultures were kept below 2% parasitemia with media changes every 48 h. Parasites were  
183 synchronized to late stage schizonts using a single 70% Percoll density gradient as previously  
184 described<sup>23</sup>. Four hours post-synchronization, parasitemia and stage were quantified using flow  
185 cytometry. 80  $\mu$ l of culture and a 5% hematocrit RBC control were stained with SYBR Green I  
186 and SYTO 61 and measured on a Guava easyCyte HT (Luminex Co.). 50,000 events were recorded  
187 to determine relative parasitemia and stage. When at least 70% of parasites were in the ring-stage,  
188 the culture was diluted to 2% hematocrit and 0.5% parasitemia and parasites were aliquoted into a  
189 96-well plate. Ten DHA concentrations were tested with a 2-fold dilution series starting with 2800  
190 nM DHA. eRRSA assay set-up and qPCR amplification was done as previously described in<sup>23</sup> to  
191 calculate a fold change value between the untreated and treated sample for three biological  
192 replicates for each parasite.

### 193 *2.5. DHA BSA and sample collection*

194 Two recombinant pools from each cross (Mal31×KH004 or NF54×NHP1337) were selected  
195 and used for DHA BSA experiments. For each pool of recombinants, one sample was taken from  
196 the original progeny pool and was not synchronized (unsynchronized control), while three other  
197 samples were taken from the original progeny pool and synchronized at 0 h, 18 h, and 36 h (**Figure**  
198 **3A**). We used a single 70% Percoll density gradient for synchronization (as described above) and  
199 allowed parasites to reinvade for four hours after synchronization to ring stages before determining  
200 parasitemia and stage via flow cytometry and setting up the DHA BSA experiment. All progeny  
201 pools (0 h, 18 h, and 36 h synchronized and unsynchronized control) were treated with DMSO  
202 (control), 50 nM DHA, or 100 nM and maintained in 48-well plates. After 6 hours, infected RBCs  
203 were washed three times with RPMI to remove any residual DHA or DMSO and then resuspended  
204 with new culture media to allow surviving parasites to grow out. Samples were collected right  
205 before drug treatment (day 0) and 5 days later when there was enough material for DNA extraction.  
206

## 207 *2.6. Library preparation and sequencing*

208 We used Qiagen DNA mini kit to extract and purify the genomic DNA, and Quant-iT™  
209 PicoGreen® Assay (Invitrogen) to quantify the amount of DNA.  
210 For samples with less than 50ng DNA obtained, whole genome amplification (WGA) was  
211 performed before NGS library preparation. WGA reactions were performed following Nair et al  
212 <sup>24</sup>. Each 25 µl reaction contained at least 5ng of *Plasmodium* DNA, 1× BSA (New England  
213 Biolabs), 1 mM dNTPs (New England Biolabs), 3.5 µM of Phi29 Random Hexamer Primer, 1×  
214 Phi29 reaction buffer (New England Biolabs), and 15 units of Phi29 polymerase (New England  
215 Biolabs). We used a PCR machine (SimpliAmp, Applied Biosystems) programmed to run a  
216 “stepdown” protocol: 35 °C for 10 min, 34 °C for 10 min, 33 °C for 10 min, 32 °C for 10 min,  
217 31 °C for 10 min, 30 °C for 6 h then heating at 65 °C for 10 min to inactivate the enzymes prior to  
218 cooling to 4 °C. Samples were cleaned with AMPure XP Beads (Beckman Coulter) at a 1:1 ratio.  
219 We constructed next generation sequencing (NGS) libraries using 50-100 ng DNA or WGA  
220 product following the KAPA HyperPlus Kit protocol with 3-cycle of PCR. All libraries were  
221 sequenced at 150bp pair-end using Illumina Novaseq S4 or Hiseq X sequencers. We sequenced all  
222 bulk samples to a minimum coverage of 100×.

223

## 224 *2.7. Mapping and genotyping*

225 We individually mapped whole-genome sequencing reads for each library against the *P.*  
226 *falciparum* 3D7 reference genome (PlasmoDB, release32) using the alignment algorithm BWA  
227 mem (<http://bio-bwa.sourceforge.net/>) under the default parameters. The resulting alignments  
228 were then converted to SAM format, sorted to BAM format, and deduplicated using picard tools  
229 v2.0.1 (<http://broadinstitute.github.io/picard/>). We used Genome Analysis Toolkit GATK v3.7  
230 (<https://software.broadinstitute.org/gatk/>) to recalibrate the base quality score based on a set of  
231 verified known variants<sup>25</sup>.

232 After alignment, we excluded the highly variable genome regions (subtelomeric repeats,  
233 hypervariable regions and centromeres) and only performed genotype calling in the 21 Mb core  
234 genome (defined in<sup>22</sup>). We called variants for each sample using HaplotypeCaller, and calls from  
235 every 100 samples were merged using CombineGVCFs with default parameters. Variants were  
236 further called at all sample-level using GenotypeGVCFs, with parameters: --max\_alternate\_alleles  
237 6 --variant\_index\_type LINEAR --variant\_index\_parameter 128000 --sample\_ploidy 2 -nt 20. We  
238 further filtered the variants calls by calculating the recalibrated variant quality scores (VQSR) of  
239 genotypes from parental parasites. Loci with VQSR less than 1 or not distinguishable between two  
240 parents were removed from further analysis.

241 The variants in VCF format were annotated for predicted functional effect on genes and  
242 proteins using snpEff v4.3 (<https://pcingola.github.io/SnpEff/>) with 3D7 (PlasmoDB, release32)  
243 as the reference.

244

## 245 2.8. Bulk segregant analysis

246 Only single-nucleotide polymorphism (SNP) loci with coverage > 30× that differed between the  
247 two parents were used for bulk segregant analysis. We counted reads with genotypes of each parent  
248 and calculated allele frequencies at each variable locus. Allele frequencies of one of the parents  
249 (NF54 or Mal31 in this study) were plotted across the genome, and outliers were removed  
250 following Hampel's rule<sup>26</sup> with a window size of 100 loci. We performed the BSA analyses using  
251 the R package QTLseqr<sup>27</sup>. Extreme-QTLs were defined when FDRs (Benjamini-Hochberg  
252 adjusted p-values) were less than 0.01<sup>28</sup>. Once a QTL was detected, we calculated and approximate  
253 95% confidence interval using Li's method<sup>29</sup> to localize causative genes.

254

### 255 3. Results

#### 256 3.1. Genetic crosses

257 We employed *Anopheles stephensi* mosquitoes and human liver-chimeric FRG huHep mice as  
 258 described in Vaughan *et al*<sup>22</sup>, to generate two unique genetic crosses (Mal31×KH004 and  
 259 NF54×NHP1337) for this study (**Figure 1A, Table 1**).

260

261 **Table 1. Segregating variation in two genetic crosses.** In addition to a known ART-R  
 262 associated mutation in *kelch13*, four variants (underlined amino acid changes) showing strong  
 263 associations in a genome wide association analysis<sup>6</sup> are also segregating in these crosses.

| Gene name      | Gene ID        | Cross 1                         |                 | Cross 2                         |                |
|----------------|----------------|---------------------------------|-----------------|---------------------------------|----------------|
|                |                | Cambodia<br>KH004               | Malawi<br>Mal31 | Thailand<br>NHP1337             | Africa<br>NF54 |
| <i>kelch13</i> | PF3D7_13437000 | C580Y                           | WT              | C580Y                           | WT             |
| <i>fd</i>      | PF3D7_1318100  | <u>D193Y</u>                    | WT              | <u>D193Y</u>                    | WT             |
| <i>arps10</i>  | PF3D7_1460900  | <u>V127M</u> ,D128H             | WT              | <u>V127M</u> ,D128H             | WT             |
| <i>mdr2</i>    | PF3D7_1447900  | <u>T484I</u> ,F423Y,G299D,S208N | I492V,S208N     | <u>T484I</u> ,F423Y,G299D,S208N | WT             |
| <i>crt</i>     | PF3D7_0709000  | DD2 <sup>1</sup> +G367C         | WT              | DD2 <sup>1</sup>                | WT             |

1. Alleles carry same amino acid mutations as the Dd2 parasite line (M74I, N75E, K76T, A220S, Q271E, N326S, I356T, R371I) when compared to reference (3D7).

264

265 *Mal31*×*KH004*: *Mal31* is a *kelch13* wild-type parasite isolated from a patient in Malawi in 2016,  
 266 *KH004* is a *kelch13* mutant parasite carrying the common C580Y mutation and was isolated from  
 267 Western Cambodia in 2016. There are 14,455 core-genome SNPs (defined in<sup>25</sup>) distinguishing  
 268 these two parental parasites. The gametocytes from both parental parasites were mixed in a ~50:50  
 269 ratio to infect approximately 450 mosquitoes. We generated four independent recombinant pools  
 270 from this cross by using independent groups of 100 mosquitoes for the isolation of sporozoites and  
 271 four individual FRG huHep mice that were infected with the sporozoites. Recombinants are  
 272 generated after gametes fuse to form zygotes in the mosquito midgut (**Figure 1A**). Mitotic division  
 273 of the four meiotic products ultimately leads to the generation of thousands of haploid sporozoites  
 274 within each oocyst. The oocyst prevalence from the cross ranged from 71-91%, with an average  
 275 of 10 oocysts per mosquito. The estimated number of recombinants for each pool were 4,000 (10  
 276 oocysts × 4 recombinants × 100 mosquitoes). The initial allele frequencies of *Mal31* were 0.75-  
 277 0.79 for bulk pools directly from mice; the deviation from the expected even representation of the  
 278 two parental alleles indicates the existence of *Mal31* selfed progeny generated by fusion of male

279 and female gametes of Mal31. Thus, the expected unique recombinants per pool will be  $\leq 4,000$   
280 for this cross. Two recombinant progeny pools were randomly selected for use in this study. For  
281 these two pools, the genome-wide allele frequencies shifted to 0.53 and 0.55 respectively after 15  
282 days of *in vitro* culture prior to DHA BSA experiments (**Figure S1**). The changes to a more even  
283 representation of the two parental genomes suggests selection against selfed progeny during *in*  
284 *vitro* blood culture, which we have detected previously in a different cross <sup>15</sup>.

285 *NF54* × *NHP1337*: *NF54* is parasite of African origin, and *NHP1337* is a C580Y *kelch13* mutant  
286 parasite isolated from the Thai-Myanmar border in 2011 and has been used previously in a genetic  
287 cross <sup>30</sup>. There are 17,318 SNPs distinguishing the two parental parasites. The gametocytes from  
288 both parental parasites were mixed in a ~50:50 ratio to feed about 450 mosquitoes (150 per cage,  
289 three cages). We generated two independent recombinant pools for this cross by using different  
290 sets of mosquitoes. The oocyst prevalence for this cross was 90% (range: 80-100%), with an  
291 average burden of 25 oocysts per mosquito midgut (range: 14-40). The estimated number of  
292 recombinants for each pool used were 10,000 (25 oocysts × 4 recombinants × 100 mosquitoes).  
293 The allele frequencies of *NF54* were 0.41 and 0.46 for bulk pools before DHA BSA experiments  
294 (**Figure S2**).

295

### 296 3.2. Determining DHA concentrations for BSA experiments

297 Maximal inhibitory concentrations, such as  $IC_{50}$  and  $IC_{90}$  would typically be used to determine  
298 the concentration of drugs used for BSA experiments (**Figure 1B**). However, for DHA,  $IC_{50}$  and  
299  $IC_{90}$  values are not correlated with patient clearance half-life, the key clinical resistance readout <sup>31</sup>.  
300 In this study, we used an assay we developed, eRRSA, to measure the DHA resistance level of the  
301 resistant parent KH004 and one of our recombinant progeny pools from the Mal31 × KH004 cross.  
302 eRRSA relies on parasite growth fold change [ $2^{(\text{average } ct \text{ drug treated} - \text{average } ct \text{ control})}$ ] to quantify parasite  
303 resistance to DHA and this read out is strongly correlated to patient clearance half-life <sup>23</sup>. We  
304 generated DHA eRRSA dose-response curves, i.e., one eRRSA for each of 10 different drug  
305 concentrations (**Figure 2**) to identify concentrations of DHA that would kill some but not all of  
306 the sensitive parasites. The eRRSA dose response curves for resistant and pooled progeny were  
307 not significantly different ( $F_{4,68} = 1.518$ ,  $p = 0.207$ ). We chose 50 nM and 100 nM for our DHA  
308 BSA experiment: 50 nM and 100 nM correspond to an eRRSA fold change of 14 (46.1% parasite  
309 survival for KH004 and 52.7% parasite survival for the Mal31 × KH004 recombinant pool) and a

310 fold change of 20 (32.4% parasite survival for KH004 and 34.1% parasite survival for the Mal31  
311 × KH004 recombinant pool), respectively.

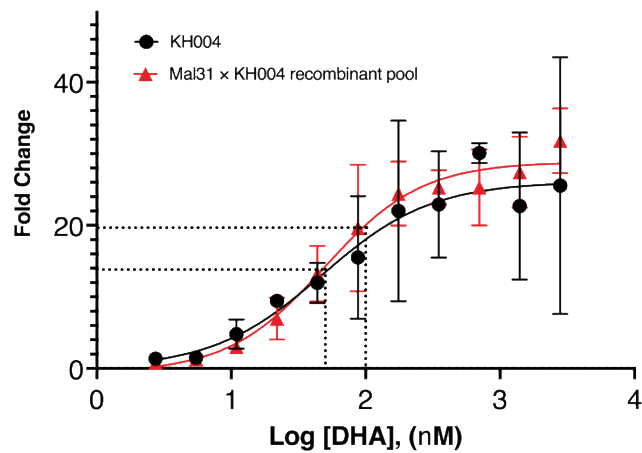

312

313 **Figure 2. eRRSA dose-response curves for the DHA resistant parent KH004 and a Mal31 ×**  
314 **KH004 recombinant progeny pool.** Synchronized ring-stage parasites were treated with 10 DHA  
315 concentrations (in a two-fold dilution series starting at 2,800 nM) for 6 hours. Higher fold-change  
316 indicates increased parasite death in drug treated versus untreated parasites using our eRRSA  
317 method. Both the KH004 parent (artemisinin-resistant) and the Mal31×KH004 recombinant  
318 progeny pool were tested using three biological replicates to determine the optimal DHA  
319 concentration for bulk segregant DHA selection. Dashed lines indicate 50 nM and 100 nM were  
320 chosen as discerning doses for treatment of bulk populations to selectively enrich for resistant  
321 parasites.

### 322 3.3. BSA with pooled progeny from the Mal31×KH004 cross

323 Malaria parasites show different tolerance levels to artemisinin drugs at different lifecycle stages  
324 (ring, trophozoite or schizont) <sup>32</sup>. To remove the influence of parasites from different stages and  
325 maximize the power of DHA BSA, we synchronized samples from the recombinant progeny pools.  
326 This was done at three time points (0, 18 or 36 h) prior to DHA BSA, and we also included an  
327 unsynchronized control (**Figure 3A**). High depth Illumina sequence (>100×) profiles of these four  
328 progeny pools revealed no significant differences (**Figure S3**).



329 We compared the Mal31 allele frequency from segregant pools with and without DHA treatment  
330 using genome-wide  $G'$  <sup>28</sup> to measure the significance level of detected QTLs (**Figure 1 C&D**).  
331 For each detected QTL (FDR < 0.01), we calculated 95% confidence intervals to define the QTL  
332 boundaries (**Table S1**). For pools without synchronization, we were not able to detect any  
333 significant QTL. For pools that were synchronized, we identified a single strong QTL on  
334 chromosome 13 at the *kelch13* locus (**Figure 3, Figure S4**). The largest allele frequency difference  
335 between control and DHA treated parasites was detected from pools synchronized at 0 h. We did  
336 not detect significant differences between 50nM and 100nM DHA treatments.

337

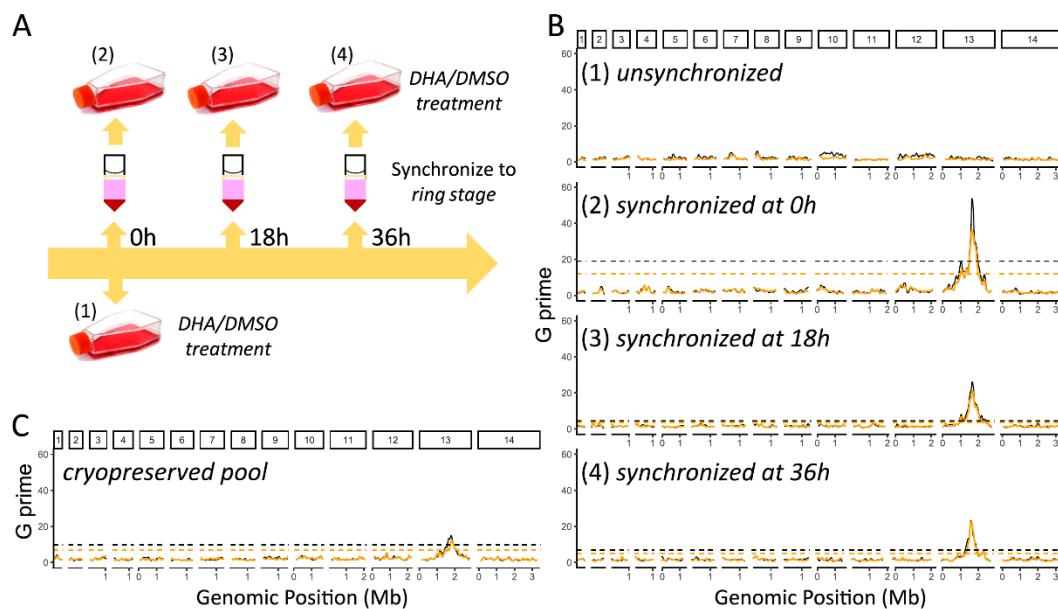

338

339 **Figure 3. DHA bulk segregant analysis (BSA) on bulk progeny from the Mal31 x KH001 cross.**

340 (A) Synchronization of parasites at the ring stage: (1) pools without synchronization; (2-4) pools  
341 synchronized at 0h, 18h and 36h, respectively. (B) DHA BSA analyses of pools synchronized at  
342 the different time points outlined in (A). (C) DHA BSA with a cryopreserved recombinant pool  
343 synchronized at 0h. Orange and black lines are  $G'$  prime values comparing allele frequency of 50  
344 nM or 100nM DHA treated pools with control pools; orange (50nM) and black (100nM) dashed  
345 lines are corresponding significance thresholds (FDR = 0.01).

346

347 *3.4. BSA with cryopreserved pooled progeny from the Mal31×KH004 cross*

348 Generation of recombinant progeny pools for each BSA experiment requires *in vitro* culture of  
349 parasites, maintaining *Anopheline* mosquitoes, and infection of FRG huHep mice, and is extremely  
350 labor intensive and costly. An alternative strategy is to use cryopreserved progeny pools for BSA  
351 experiments. We compared allele frequencies of a Mal31×KH004 progeny pool before and after  
352 cryopreservation. In the absence of drug treatment, the allele frequency across the genome  
353 remained at the same level in progeny pools before and after synchronization. We observed a  
354 modest divergence in allele frequency at chromosome 2 and 14, with increased frequency of Mal31  
355 alleles, which may indicate a reduction in parasite population diversity (**Figure S3 B**). We applied  
356 DHA BSA to this cryopreserved pool (**Figure 3C**) and compared results with BSA before  
357 cryopreservation (**Figure 3B, panel 2**). We detected a strong QTL at the *kelch13* locus, although  
358 the G prime values were approximately five-fold less and the 95% CIs were approximately ten  
359 times larger as compared to the results from the original BSA analysis.

360 *3.5. BSA with NF54×NHP1337 cross*

361 Based on previously published eRRSA values for NHP1337<sup>23</sup>, we also applied DHA BSA to  
362 pooled progeny from the NF54×NHP1337 cross using the same methodology and DHA  
363 concentrations as described for the Mal31×KH004 cross. As with the Mal31×KH004 cross, no  
364 significant difference in allele frequency was detected from pools with and without  
365 synchronization prior to BSA (**Figure S2**). Similarly, we detected a strong QTL at the *kelch13*  
366 locus from both biological replicates after synchronization, but not in the unsynchronized control  
367 (**Figure S5**). A second smaller QTL peak on chr 14 was detected in one of the two biological  
368 replicates.

369

370 **4. Discussion**

371 Given the success of BSA approaches for identification of drug resistance loci in rodent malaria  
372<sup>33-35</sup>, our aim was to develop a BSA method to identify drug resistance loci in *P. falciparum* to  
373 better exploit our capacity to conduct *P. falciparum* genetic crosses in humanized mice<sup>36</sup>. To  
374 develop our approach, we chose DHA, the active metabolite of artemisinin, as a test drug. This



375 drug shows highly stage specific drug action, targeting young rings<sup>37</sup>. Furthermore, there is a well-  
376 known locus (*kelch13*) underlying ART-resistance that provides a valuable positive control for  
377 assessing and optimizing our methods<sup>17</sup>. We specifically aimed to explore the impact of (i) parasite  
378 synchronization, (ii) parasite cryopreservation, and (iii) to develop strategies to choose optimal  
379 drug selection regimens for BSA. The power of BSA is strongly dependent on the number of  
380 recombinant parasites present in progeny pools. Therefore, methods for BSA with malaria  
381 parasites should aim to minimize time in culture prior to selection, and avoid possible procedures  
382 that may reduce the diversity of recombinant pools.

#### 383 *4.1. Synchronization influences BSA success*

384 Antimalarial drugs show a spectrum of specificity for different parasite asexual blood stages  
385 (rings, trophozoites, schizonts). At one end of the spectrum, drugs such as chloroquine kill all of  
386 these stages and show minimal stage specificity. At the other extreme, drugs such as DHA,  
387 cycloheximide, and trichostatin<sup>38</sup>, or newly developed drugs like BCH070<sup>39</sup>, show strong  
388 specificity for early rings, while drugs such as lumefantrine (peak activity: 16-40h), mefloquine  
389 (16-40h) and piperazine (12-36 h) do not kill early rings and show specificity for trophozoites<sup>40</sup>.  
390 Importantly, we determined that synchronization is essential for a successful DHA BSA: with  
391 synchronization, we were able to clearly detect the known *kelch13* peak and without  
392 synchronization we detected no peaks (Figure 3B). Synchronizing parasites to early ring-stage  
393 allowed us to specifically target ring-stage resistance; the presence of other parasite stages in the  
394 culture is an additional variable that thus limits the success of selection. We suggest that  
395 synchronization should be used for BSA experiments with drugs like DHA that are active against  
396 early rings, and for drugs where no stage specificity information is available.

397 Our experiments with Mal31×KH004 also involved differently synchronized parasite pools (0,  
398 18 or 36 h) prior to BSA. Selection on all three pools resulted in a strong significant QTL peak at  
399 *kelch13*. Notably, the strongest QTL localizing to *kelch13* was in the population synchronized at  
400 0h and reduced in magnitude at 18h and 36h. This is likely due to the developmental stage  
401 differences between the recombinant progeny pools corresponding to these timepoints. According  
402 to flow cytometry of the progeny pool synchronized at 0h, the population was 91% ring stage; at  
403 18h 89% of the synchronized population was ring stage, and at 36h 65% of the synchronized  
404 population was ring stage, and the unsynchronized population was 68% ring stage. We suspect

405 that the high proportion of ring-stages in the 0 h synchronized progeny pool maintained higher  
406 diversity than the 18h and 36h synchronizations, which resulted in a stronger QTL. The lack of a  
407 detectable QTL in unsynchronized cultures, most likely results from presence of late stage  
408 parasites (late trophozoites and schizonts) which are not killed by DHA, but contain more DNA  
409 than rings and therefore swamp out signal from rings in the BSA experiments.

#### 410 *4.2. Cryopreserved recombinant progeny pools can be used for drug BSA experiments*

411 *P. falciparum* asexual stage culture can be maintained and manipulated indefinitely *in vitro* or  
412 cryopreserved for future study. Once bulk recombinant progeny pools are isolated from the FRG  
413 huHep mouse, they can be directly used in BSA experiments, and they also can be cryopreserved.  
414 Cryopreservation allows for multiple BSA experiments to be conducted using the same  
415 recombinant progeny pool at a later date. However, only ring stage parasites survive the freeze and  
416 thaw process. Due to the asynchrony over time of the clones in the bulk recombinant progeny  
417 pools recovered from FRG huHep mice, the diversity of the population is likely to be diminished  
418 during the process of cryopreservation, thawing, and parasite regrowth. Encouragingly, these BSA  
419 experiments reveal the same QTL before and after cryopreservation (Figure 3C), confirming that  
420 sufficient genetic variation is maintained in cryopreserved stocks of recombinant progeny pools to  
421 be used for BSA experiments. However, we note that the chromosome 13 QTL peak detected,  
422 while strongly significant, is smaller than detected prior to cryopreservation, suggesting some loss  
423 of recombinants within pools. Methods that maximize size and diversity of progeny pools can  
424 increase the success of BSA experiments. These include ensuring that bulk progeny are  
425 cryopreserved when rings predominate, and that culture time between parasite recovery from  
426 cryopreservation and BSA is minimized. We also note that we are able to conduct BSA  
427 experiments using cryopreserved progeny pools from several biological replicates of each cross,  
428 providing replication and added confidence in the QTL peaks detected.

429

#### 430 *4.3. Determining drug concentrations for BSA selection experiments*

431 The goal of a selective drug BSA is to kill only the sensitive parasites in the sample exposed to  
432 drug. Therefore, the drug concentration chosen for selection is very important. If the dose is too  
433 high, few parasites in the treated pool will survive, while if the dose is too low many sensitive

434 parasites will survive, and one will not see enrichment of alleles and QTLs resulting from drug  
435 selection. In yeast BSA experiments, particular strong selection (recovers <1% of the total progeny)  
436 has been used as a rule of thumb to select progeny showing extreme phenotypes<sup>7</sup>. This works well  
437 for yeast, where recombinant pools can contain >10<sup>6</sup> recombinants, but in our experience with *P.*  
438 *falciparum*, the use of such stringent drug doses for BSA can result in poor recovery of parasites  
439 in the treated pools.

440 To choose drug concentrations for BSA, we measured drug response in the resistant parent and  
441 one of our recombinant progeny pools. Traditional IC<sub>50</sub> measures work poorly with short half-life  
442 drugs such as DHA, so we examined dose response using a modified ring stage assay (eRRSA;  
443 Figure 2)<sup>23</sup> which examines parasite survival following a short pulse of drug exposure, to generate  
444 dose response curves. We observed a slight shift in the eRRSA dose-response curve between the  
445 resistant parasite, KH004, and the Mal31 × KH004 recombinant progeny pool, although the two  
446 curves were not significantly different. We chose two DHA doses at 50 nM and 100 nM for our  
447 DHA BSA experiment to kill some but not all the sensitive parasites. Given the high value of stock  
448 samples of bulk progeny and the time and cost of the BSA experiment, it is important to conduct  
449 these initial experiments to enhance the chance of successful selections. Encouragingly, we found  
450 that both DHA doses revealed the same QTLs with near equivalent results with this small dosing  
451 concentration range of DHA in the Mal31×KH004 cross. The 100nM dose (32.4% parasite  
452 survival for KH004 and 34.1% parasite survival for the Mal31 × KH004 recombinant pool)  
453 revealed slightly higher QTL peaks and having two doses provided technical replication. Use of  
454 dose response data from uncloned progeny pools could be helpful when progeny drug responses  
455 fall outside the range of the parents (transgressive segregation)<sup>41</sup> or in cases where there is no prior  
456 information about progeny drug responses. A practical alternative that should work when the  
457 genetic architecture is simple and parent phenotypes are significantly different is to measure drug  
458 responses in parental parasites, and choose two or three drug doses bracketing the IC<sub>50</sub> (of  
459 equivalent metric) of the most resistant parent. We anticipate that a use of a well-chosen range of  
460 selection doses could reveal aspects of the genetic architecture that would not be revealed by a  
461 single dose.

462

463 *4.4. Genetic architecture of DHA resistance*

464 The primary goal of this project was to develop methodology for drug BSA experiments with  
465 *P. falciparum*. However, these crosses also provide information on the genetic architecture of  
466 artemisinin resistance. Four lines of evidence suggest that loci other than *kelch13* may contribute  
467 to resistance: (i) GWAS studies have identified several loci (*ferredoxin*, *apicoplast ribosomal*  
468 *protein S10*, *multidrug resistance protein 2* and *crt*) as well as *kelch13* to be associated with  
469 artemisinin resistance<sup>6</sup>; (ii) parasites showing slow clearance from artemisinin-treated patients but  
470 lacking mutations in *kelch13* have been described<sup>42</sup>; and (iii) longitudinal analyses have shown  
471 that other loci show parallel changes in allele frequency over time<sup>43</sup>, suggesting that other loci  
472 may also contribute to slow clearance phenotypes; (iv) *in vitro* selection has revealed other loci,  
473 such as *pfcoronin*, that can modulate ART-R<sup>21</sup>.

474 The two crosses analyzed here show a single QTL indicating that *kelch13* is the largest genetic  
475 signal of this phenotype. We observed smaller signals meeting significance threshold on  
476 chromosomes 14 for some replicates (Fig .S5). However, as these reach significance in only some  
477 replicates, and are also seen in control (untreated samples), they most likely reflect loci underlying  
478 differences in growth rate, rather than try resistance QTLs. This illustrates a further advantage of  
479 BSA: by conducting replicate BSA experiments using independent pools of progeny we can  
480 minimize detection of false positive QTLs.

481 Importantly, these crosses allow us to interrogate candidate loci. Both genetic crosses analyzed  
482 have segregating SNPs in *ferredoxin*, *apicoplast ribosomal protein S10*, *multidrug resistance*  
483 *protein 2* and *crt*. Interestingly, while these loci show strong association with slow clearance in a  
484 GWAS, they were proposed to provide permissive background mutations on which ART-R  
485 mutations could arise<sup>6</sup>, perhaps through impacts on fitness. In our BSA experiments, we sampled  
486 parasite pools at several time points after drug exposure. This allows detection of QTLs underlying  
487 both drug resistance and fitness. We did not detect QTLs at any of these four loci, suggesting that  
488 these SNPs do not play a role in ART-R, or contribute to fitness of ART-R parasites. These results  
489 are consistent with results from CRISPR/Cas9 editing of *ferredoxin* and *mdr2* SNPs<sup>44</sup>, where no  
490 impact of these SNPs on ART-R or fitness was found.

491 Undertaking more complex BSA analyses using an increased range of drug concentrations may  
492 help uncover further loci that play a role in resistance. In addition, further crosses may identify  
493 additional loci underlying artemisinin resistance. For example, for 20 years *crt* has been considered

494 to be the primary determinant of CQ resistance. However, in parallel work on CQ-resistance we  
495 have identified a prominent chromosome 6 QTL that acts in concert with *crt* to determine CQ  
496 resistance in some crosses<sup>45</sup>. Our ability to conduct genetic crosses in FRG huHep mice provides  
497 a direct approach to identify suspected non-*kelch13* mechanisms of artemisinin resistance using  
498 parasites isolated from patients<sup>46</sup>.

499

#### 500 *4.5. BSA is broadly applicable to selectable phenotypic traits*

501 We have demonstrated that BSA is a powerful approach in determining genes related to drug  
502 resistance (this study) in *P. falciparum*, paralleling findings from other organisms<sup>47-50</sup>. In other  
503 work we have used BSA to examine the impact of culture conditions (serum or AlbuMAX)<sup>16</sup>, and  
504 identifying genome regions that impact parasite fitness<sup>15</sup>. We anticipate that BSA can also be  
505 explored to study any phenotypic trait that can be measured by selection. For example, we can  
506 examine the selection on parasite populations at different temperatures, which simulate one of the  
507 malaria symptoms – fever<sup>51</sup>. We can control the pH of culture media, which can be changed in  
508 patients with severe malaria due to acidosis<sup>52</sup>. We can also study the selection of human immunity  
509 on progeny population by culturing parasites with serum from recovered patients or people that  
510 have never had malaria, as was done with mouse malaria<sup>53</sup>. BSA can also be used to study parasite-  
511 host interactions. Malaria parasites invade human red blood cells (RBCs) by a series of interactions  
512 between host and parasite surface proteins<sup>54</sup>. Hence, we can use different blood cell populations  
513 to examine genes underlying parasite invasion phenotypes. Furthermore, Anopheline mosquitoes  
514 are the intermediate host between parasite and human and the distribution of mosquitoes varies at  
515 different geographical locations. For example, *Anopheles gambiae* mosquitoes are common  
516 vectors in Africa, while *Anopheles dirus* and *Anopheles minimus* are the dominant vectors in Asia  
517<sup>55</sup>. Hence we can infect different mosquitoes with recombinant progeny populations to examine  
518 the selection at the mosquito stage, as pioneered by Molina-Cruz et al<sup>56</sup>.

519

#### 520 *4.6. Technical considerations & caveats*

521 Statistical power and numbers of recombinants. The power of BSA is limited by the number of  
522 unique recombinant progeny in a pool. To maximize the number of recombinants, we can increase  
523 the number of mosquitoes we use for sporozoite isolation per cross, thereby increasing the number  
524 of unique recombinants. In addition, we are not limited to one mouse per cross and then can thus  
525 increase mouse numbers and infect each mouse with unique sporozoite pools, providing biological  
526 replicates. Cryopreservation of large volumes of recombinant after the transition to *in vitro* culture  
527 is also important and upon thawing, multiple independent pools can be analyzed with downstream  
528 BSA. Selfed progeny are another limitation for the statistical power of BSA. We have found large  
529 numbers of inbred progeny generated by mating between male and female gametes from the same  
530 parent, in some crosses<sup>15,57</sup>. However, selfed progeny are selectively removed during asexual  
531 growth<sup>15</sup>. Selfed progeny could also be removed by carrying out crosses with parental strains that  
532 only produce either functional male or female gametes, to ensure that all progeny are recombinant.  
533 For example, treatment with aphidicolin blocks male gamete production<sup>58</sup>.

534 Assessing the numbers of recombinants. We have been using the number of oocysts and  
535 sequences from cloned progeny to estimate the maximum number of recombinants in a  
536 recombinant pool. Measuring the number of recombinant progeny and the proportion of inbreeding  
537 in a pool before BSA could be particularly useful for future crosses. This can be done by laborious  
538 cloning from the same pools<sup>30</sup>. Alternatively, single cell genome sequencing<sup>59</sup> can be employed  
539 to analyze the diversity of the recombinant pool. Thus, rapid genotyping of sporozoites or the  
540 progeny pool could provide details on the dynamics of BSA experiments, which will then allow  
541 for the further optimization approaches<sup>60</sup>.

542 Balancing the experiment time and culture volume. BSA can be used to examine the impact of  
543 multiple different selections in parallel. However, if multiple experiments are conducted at the  
544 same time, large numbers of parasites are needed, which requires a longer culture time. Population  
545 diversity decreases during *in vitro* culture due to parasite competition<sup>15</sup>. A solution to this is to  
546 use smaller culture volumes for BSA experiments without compromising genetic diversity. We  
547 have used 3 ml (6-well plate, in<sup>15,16</sup>) and 500  $\mu$ l culture (48-well plate, in this study) at 1%  
548 parasitemia for our previous experiments, which both allow us to collect enough material for  
549 sequencing and keep diversity of the bulk. However, we were not able to sample efficiently using  
550 smaller culture volumes such as 100  $\mu$ l from 96-well plate.



551

## 552 **5. Data Availability**

553 All data needed to evaluate the conclusions in the paper are present in the paper and/or the  
554 Supplementary Materials. All raw sequencing data have been submitted to the NABI Sequence  
555 Read Archive (SRA, <https://www.ncbi.nlm.nih.gov/sra>) under the project number of  
556 PRJNA524855. Additional data related to this paper may be requested from the authors.

557

## 558 **6. Acknowledgments**

559 This work was supported by National Institutes of Health (NIH) program project grant P01  
560 AI127338 (to MF) and by NIH grant R37 AI048071 (to TJCA). Work at Texas Biomedical  
561 Research Institute was conducted in facilities constructed with support from Research Facilities  
562 Improvement Program grant C06 RR013556 from the National Center for Research Resources.  
563 SMRU is part of the Mahidol Oxford University Research Unit supported by the Wellcome Trust  
564 of Great Britain. The parental line, Mal31, used in the *Mal31* × *KH004* cross was sampled from a  
565 Malawian patient in 2016 as part of a cross-sectional study funded by the Wellcome Trust of Great  
566 Britain (Grant no. 099992/Z/12/Z to SCN). We thank the patients who provided parasites used in  
567 this work.

568

## 569 **Declaration of interests**

570 We declare no competing interests.

571

## 572 **Contributors**

573 TJCA, MTF and AMV conceived the project. KVB, XL and SK conceptualized and planned  
574 the study. SN, FN, MD, RT, TP, DL provided and characterized malaria parasites from infected  
575 patients from which parental parasites were chosen. SK, BAA and MTH prepared all the genetic  
576 crosses. KVB, LAC and DAS prepared BSA samples and DHA drug assay experiment. XL  
577 interpreted and visualized the data and performed formal analysis. ED and AR were involved in  
578 next generation sequencing library preparations. KVB, XL, SK, AMV, MTF and TJCA wrote the  
579 original manuscript. All authors read and approved the final manuscript.

580

## 581 **References**

- 582 1. Anderson T, Nkhoma S, Ecker A, Fidock D. How can we identify parasite genes that underlie  
583 antimalarial drug resistance? *Pharmacogenomics* 2011; **12**(1): 59-85.
- 584 2. Wellems TE, Panton LJ, Gluzman IY, et al. Chloroquine resistance not linked to mdr-like genes in  
585 a Plasmodium falciparum cross. *Nature* 1990; **345**(6272): 253-5.
- 586 3. Su X-z, Ferdig MT, Huang Y, et al. A genetic map and recombination parameters of the human  
587 malaria parasite Plasmodium falciparum. *Science* 1999; **286**(5443): 1351-3.
- 588 4. Fidock DA, Nomura T, Talley AK, et al. Mutations in the P. falciparum digestive vacuole  
589 transmembrane protein PfCRT and evidence for their role in chloroquine resistance. *Molecular cell* 2000;  
590 **6**(4): 861-71.
- 591 5. Wang Z, Cabrera M, Yang J, et al. Genome-wide association analysis identifies genetic loci  
592 associated with resistance to multiple antimalarials in Plasmodium falciparum from China-Myanmar  
593 border. *Scientific reports* 2016; **6**(1): 1-12.
- 594 6. Miotto O, Amato R, Ashley EA, et al. Genetic architecture of artemisinin-resistant Plasmodium  
595 falciparum. *Nature genetics* 2015; **47**(3): 226-34.
- 596 7. Ehrenreich IM, Torabi N, Jia Y, et al. Dissection of genetically complex traits with extremely large  
597 pools of yeast segregants. *Nature* 2010; **464**(7291): 1039-42.
- 598 8. Michelmore RW, Paran I, Kesseli R. Identification of markers linked to disease-resistance genes  
599 by bulked segregant analysis: a rapid method to detect markers in specific genomic regions by using  
600 segregating populations. *Proceedings of the national academy of sciences* 1991; **88**(21): 9828-32.
- 601 9. Abkhallo HM, Martinelli A, Inoue M, et al. Rapid identification of genes controlling virulence and  
602 immunity in malaria parasites. *PLoS pathogens* 2017; **13**(7): e1006447.
- 603 10. Hunt P, Martinelli A, Modrzynska K, et al. Experimental evolution, genetic analysis and genome  
604 re-sequencing reveal the mutation conferring artemisinin resistance in an isogenic lineage of malaria  
605 parasites. *BMC genomics* 2010; **11**(1): 1-13.
- 606 11. Martinelli A, Cheesman S, Hunt P, et al. A genetic approach to the de novo identification of  
607 targets of strain-specific immunity in malaria parasites. *Proceedings of the National Academy of Sciences*  
608 2005; **102**(3): 814-9.
- 609 12. Burga A, Ben-David E, Vergara TL, Boocock J, Kruglyak L. Fast genetic mapping of complex traits  
610 in C. elegans using millions of individuals in bulk. *Nature communications* 2019; **10**(1): 1-10.
- 611 13. Blake DP, Billington KJ, Copestake SL, et al. Genetic mapping identifies novel highly protective  
612 antigens for an apicomplexan parasite. *PLoS pathogens* 2011; **7**(2): e1001279.
- 613 14. Chevalier FD, Valentim CL, LoVerde PT, Anderson TJ. Efficient linkage mapping using exome  
614 capture and extreme QTL in schistosome parasites. *BMC genomics* 2014; **15**(1): 1-12.
- 615 15. Li X, Kumar S, McDew-White M, et al. Genetic mapping of fitness determinants across the  
616 malaria parasite Plasmodium falciparum life cycle. *PLoS genetics* 2019; **15**(10): e1008453.
- 617 16. Kumar S, Li X, McDew-White M, et al. Bulk segregant approaches to nutritional genomics in  
618 Plasmodium falciparum. *bioRxiv* 2020.
- 619 17. Birnbaum J, Scharf S, Schmidt S, et al. A Kelch13-defined endocytosis pathway mediates  
620 artemisinin resistance in malaria parasites. *Science* 2020; **367**(6473): 51-9.
- 621 18. Amato R, Pearson RD, Almagro-Garcia J, et al. Origins of the current outbreak of multidrug-  
622 resistant malaria in southeast Asia: a retrospective genetic study. *The Lancet Infectious Diseases* 2018;  
623 **18**(3): 337-45.
- 624 19. Project MPfC. Genomic epidemiology of artemisinin resistant malaria. *elife* 2016; **5**: e08714.



- 625 20. Balikagala B, Fukuda N, Ikeda M, et al. Evidence of Artemisinin-Resistant Malaria in Africa. *New*  
626 *England Journal of Medicine* 2021; **385**(13): 1163-71.
- 627 21. Demas AR, Sharma AI, Wong W, et al. Mutations in Plasmodium falciparum actin-binding protein  
628 coronin confer reduced artemisinin susceptibility. *Proc Natl Acad Sci U S A* 2018; **115**(50): 12799-804.
- 629 22. Vaughan AM, Pinapati RS, Cheeseman IH, et al. Plasmodium falciparum genetic crosses in a  
630 humanized mouse model. 2015; **12**(7): 631-3.
- 631 23. Davis SZ, Singh PP, Vendrely KM, et al. The extended recovery ring-stage survival assay provides  
632 a superior association with patient clearance half-life and increases throughput. 2020; **19**(1): 1-9.
- 633 24. Nair S, Nkhoma SC, Serre D, et al. Single-cell genomics for dissection of complex malaria  
634 infections. 2014; **24**(6): 1028-38.
- 635 25. Miles A, Iqbal Z, Vauterin P, et al. Indels, structural variation, and recombination drive genomic  
636 diversity in Plasmodium falciparum. 2016; **26**(9): 1288-99.
- 637 26. Davies L, Gather UJJotASA. The identification of multiple outliers. 1993; **88**(423): 782-92.
- 638 27. Mansfeld BN, Grumet RJTpg. QTLseqr: an R package for bulk segregant analysis with next -  
639 generation sequencing. 2018; **11**(2): 180006.
- 640 28. Magwene PM, Willis JH, Kelly JKJpcb. The statistics of bulk segregant analysis using next  
641 generation sequencing. 2011; **7**(11): e1002255.
- 642 29. Li H. A quick method to calculate QTL confidence interval. *Journal of genetics* 2011; **90**(2): 355-  
643 60.
- 644 30. Button-Simons KA, Kumar S, Carmago N, et al. The power and promise of genetic mapping from  
645 Plasmodium falciparum crosses utilizing human liver-chimeric mice. *Commun Biol* 2021; **4**(1): 734.
- 646 31. Witkowski B, Amaratunga C, Khim N, et al. Novel phenotypic assays for the detection of  
647 artemisinin-resistant Plasmodium falciparum malaria in Cambodia: in-vitro and ex-vivo drug-response  
648 studies. 2013; **13**(12): 1043-9.
- 649 32. Cui L, Wang Z, Miao J, et al. Mechanisms of in vitro resistance to dihydroartemisinin in  
650 Plasmodium falciparum. 2012; **86**(1): 111-28.
- 651 33. Carter R, Hunt P, Cheesman S. Linkage Group Selection—a fast approach to the genetic analysis  
652 of malaria parasites. *International journal for parasitology* 2007; **37**(3-4): 285-93.
- 653 34. Modrzynska KK, Creasey A, Loewe L, et al. Quantitative genome re-sequencing defines multiple  
654 mutations conferring chloroquine resistance in rodent malaria. *BMC genomics* 2012; **13**(1): 1-16.
- 655 35. Borges S, Cravo P, Creasey A, et al. Genomewide scan reveals amplification of mdr1 as a  
656 common denominator of resistance to mefloquine, lumefantrine, and artemisinin in Plasmodium  
657 chabaudi malaria parasites. *Antimicrobial agents and chemotherapy* 2011; **55**(10): 4858-65.
- 658 36. Vaughan AM, Pinapati RS, Cheeseman IH, et al. Plasmodium falciparum genetic crosses in a  
659 humanized mouse model. *Nature methods* 2015; **12**(7): 631-3.
- 660 37. Witkowski B, Khim N, Chim P, et al. Reduced artemisinin susceptibility of Plasmodium falciparum  
661 ring stages in western Cambodia. *Antimicrobial agents and chemotherapy* 2013; **57**(2): 914-23.
- 662 38. Wilson DW, Langer C, Goodman CD, McFadden GI, Beeson JG. Defining the timing of action of  
663 antimalarial drugs against Plasmodium falciparum. *Antimicrobial agents and chemotherapy* 2013; **57**(3):  
664 1455-67.
- 665 39. Clements RL, Strelva V, Dumoulin P, et al. A novel antiparasitic compound kills ring-stage  
666 Plasmodium falciparum and retains activity against artemisinin-resistant parasites. *The Journal of*  
667 *infectious diseases* 2020; **221**(6): 956-62.
- 668 40. Hodel EM, Kay K, Hastings IM. Incorporating stage-specific drug action into pharmacological  
669 modeling of antimalarial drug treatment. *Antimicrobial agents and chemotherapy* 2016; **60**(5): 2747-56.
- 670 41. Nogami S, Ohya Y, Yvert G. Genetic complexity and quantitative trait loci mapping of yeast  
671 morphological traits. *PLoS genetics* 2007; **3**(2): e31.

- 672 42. Mukherjee A, Bopp S, Magistrado P, et al. Artemisinin resistance without pfcy5 mutations in  
673 Plasmodium falciparum isolates from Cambodia. *Malaria journal* 2017; **16**(1): 1-12.
- 674 43. Cerqueira GC, Cheeseman IH, Schaffner SF, et al. Longitudinal genomic surveillance of  
675 Plasmodium falciparum malaria parasites reveals complex genomic architecture of emerging artemisinin  
676 resistance. *Genome Biol* 2017; **18**(1): 78.
- 677 44. Stokes BH, Dhingra SK, Rubiano K, et al. Plasmodium falciparum K13 mutations in Africa and Asia  
678 impact artemisinin resistance and parasite fitness. *Elife* 2021; **10**.
- 679 45. Li X, Kumar S, Vendrely K, et al. Efficient mapping of complex traits in the malaria parasite  
680 plasmodium falciparum using genetic crosses and bulk sequencing. *ASTMH* 2020.
- 681 46. Vendrely KM, Kumar S, Li X, Vaughan AM. Humanized Mice and the Rebirth of Malaria Genetic  
682 Crosses. *Trends Parasitol* 2020; **36**(10): 850-63.
- 683 47. Khan AH, Lin A, Wang RT, Bloom JS, Lange K, Smith DJ. Pooled analysis of radiation hybrids  
684 identifies loci for growth and drug action in mammalian cells. *Genome Res* 2020; **30**(10): 1458-67.
- 685 48. Park Y, Gonzalez-Martinez RM, Navarro-Cerrillo G, et al. ABCG transporters mediate insect  
686 resistance to multiple Bt toxins revealed by bulk segregant analysis. *BMC Biol* 2014; **12**: 46.
- 687 49. Hunt P, Martinelli A, Modrzynska K, et al. Experimental evolution, genetic analysis and genome  
688 re-sequencing reveal the mutation conferring artemisinin resistance in an isogenic lineage of malaria  
689 parasites. *BMC Genomics* 2010; **11**: 499.
- 690 50. Borges S, Cravo P, Creasey A, et al. Genomewide scan reveals amplification of mdr1 as a  
691 common denominator of resistance to mefloquine, lumefantrine, and artemisinin in Plasmodium  
692 chabaudi malaria parasites. *Antimicrob Agents Chemother* 2011; **55**(10): 4858-65.
- 693 51. Gravenor M, Kwiatkowski D. An analysis of the temperature effects of fever on the intra-host  
694 population dynamics of Plasmodium falciparum. *Parasitology* 1998; **117**(2): 97-105.
- 695 52. GEARY TG, DIVO AA, BONANNI LC, JENSEN JB. Nutritional Requirements of Plasmodium  
696 falciparum in Culture. III. Further Observations on Essential Nutrients and Antimetabolites 1:  
697 METABOLISM AND ANTIMETABOLITES IN P. FALCIPARUM. *The Journal of protozoology* 1985; **32**(4): 608-  
698 13.
- 699 53. Martinelli A, Cheesman S, Hunt P, et al. A genetic approach to the de novo identification of  
700 targets of strain-specific immunity in malaria parasites. *Proc Natl Acad Sci U S A* 2005; **102**(3): 814-9.
- 701 54. Cowman AF, Tonkin CJ, Tham WH, Duraisingh MT. The Molecular Basis of Erythrocyte Invasion  
702 by Malaria Parasites. *Cell Host Microbe* 2017; **22**(2): 232-45.
- 703 55. Sinka ME. Global distribution of the dominant vector species of malaria. Anopheles mosquitoes-  
704 New insights into malaria vectors: IntechOpen; 2013.
- 705 56. Molina-Cruz A, Garver LS, Alabaster A, et al. The human malaria parasite Pfs47 gene mediates  
706 evasion of the mosquito immune system. *Science* 2013; **340**(6135): 984-7.
- 707 57. Button-Simons KA, Kumar S, Carmago N, et al. The power and promise of genetic mapping from  
708 Plasmodium falciparum crosses utilizing human liver-chimeric mice. 2021; **4**(1): 1-13.
- 709 58. Ramiro RS, Khan SM, Franke-Fayard B, Janse CJ, Obbard DJ, Reece SE. Hybridization and pre-  
710 zygotic reproductive barriers in Plasmodium. *Proc Biol Sci* 2015; **282**(1806): 20143027.
- 711 59. Dia A, Cheeseman IH. Single-cell genome sequencing of protozoan parasites. *Trends Parasitol*  
712 2021; **37**(9): 803-14.
- 713 60. Abkhallo HM, Martinelli A, Inoue M, et al. Rapid identification of genes controlling virulence and  
714 immunity in malaria parasites. *PLoS Pathog* 2017; **13**(7): e1006447.

715

## 716 **Figure legends**

717 **Figure 1. The principles of bulk segregant analysis with human malaria parasites.** (A) Generation  
718 of recombinant progeny pools using *Anopheles stephensi* mosquitoes and FRG huHep mice. (B)  
719 Determination of drug concentration for bulk segregant analysis (BSA). A standard approach is to  
720 measure the IC<sub>50</sub> and IC<sub>90</sub> of the resistant parent, however, in this study, we used eRRSA to  
721 determine a discerning drug concentration for selection since classical IC<sub>50</sub> and IC<sub>90</sub> measurements  
722 using DHA do not correlate with clinical parasite clearance rate. (C) Apply selection with drug of  
723 choice, each bar indicates a representative recombinant progeny. (D) Genomic sequencing  
724 measures changes in allele frequency of segregant pools. Green arrows indicate allele frequency  
725 changes detected from both pools with and without drug treatment, which are thus not related to  
726 drug resistance, while the orange arrow indicates a locus conferring drug resistance.

727 **Figure 2. eRRSA dose-response curves for the DHA resistant parent KH004 and a Mal31 ×**  
728 **KH004 recombinant progeny pool.** Synchronized ring-stage parasites were treated with 10 DHA  
729 concentrations (in a two-fold dilution series starting at 2,800 nM) for 6 hours. Higher fold-change  
730 indicates increased parasite death in drug treated versus untreated parasites using our eRRSA  
731 method. Both the KH004 parent (artemisinin-resistant) and the Mal31×KH004 recombinant  
732 progeny pool were tested using three biological replicates to determine the optimal DHA  
733 concentration for bulk segregant DHA selection. Dashed lines indicate 50 nM and 100 nM were  
734 chosen as discerning doses for treatment of bulk populations to selectively enrich for resistant  
735 parasites.

736 **Figure 3. DHA bulk segregant analysis (BSA) on bulk progeny from the Mal31×KH001 cross.**  
737 (A) Synchronization of parasites at the ring stage: (1) pools without synchronization; (2-4) pools  
738 synchronized at 0h, 18h and 36h, respectively. (B) DHA BSA analyses of pools synchronized at  
739 the different time points outlined in (A). (C) DHA BSA with a cryopreserved recombinant pool  
740 synchronized at 0h. Orange and black lines are G prime values comparing allele frequency of 50  
741 nM or 100nM DHA treated pools with control pools; orange (50nM) and black (100nM) dashed  
742 lines are corresponding significance thresholds (FDR = 0.01).

743
